# Supplementary material
Source: PubMed Central journal article supplement (PMC3985869)
Supplement: ja410860n_si_001.pdf [file ja410860n_si_001.pdf]

# Supporting information for: pH Induced Stability Switching of the Bacteriophage HK97 Maturation Pathway

Eric R. May,<sup>\*,†</sup> Karunesh Arora,<sup>‡</sup> and Charles L. Brooks III<sup>\*,‡</sup>

*Department of Molecular and Cell Biology, University of Connecticut, Storrs, CT 06269, and  
Department of Chemistry and Biophysics Program, University of Michigan, Ann Arbor, MI 48109*

E-mail: eric.may@uconn.edu; brookscl@umich.edu

Phone: (734)647-6682. Fax: (734)647-1604

## Supporting Information Available

### Pathway Analysis

We performed additional analyses on our pathway to support the feasibility of the path. We examined the normal mode contributions to the displacements in the pathway and observed a good balance between low frequency (modes 1-500) and high frequency displacements throughout the path, Figure 1.

In Figure 2, we compare the initial pathway with the string refined pathway in  $\Delta$ RMSD space, to illustrate the non-linearity in the displacements introduced by refinement to a low-energy path.

This material is available free of charge via the Internet at <http://pubs.acs.org>.

---

\*To whom correspondence should be addressed

<sup>†</sup>Department of Molecular and Cell Biology, University of Connecticut, Storrs, CT 06269

<sup>‡</sup>Department of Chemistry and Biophysics Program, University of Michigan, Ann Arbor, MI 48109

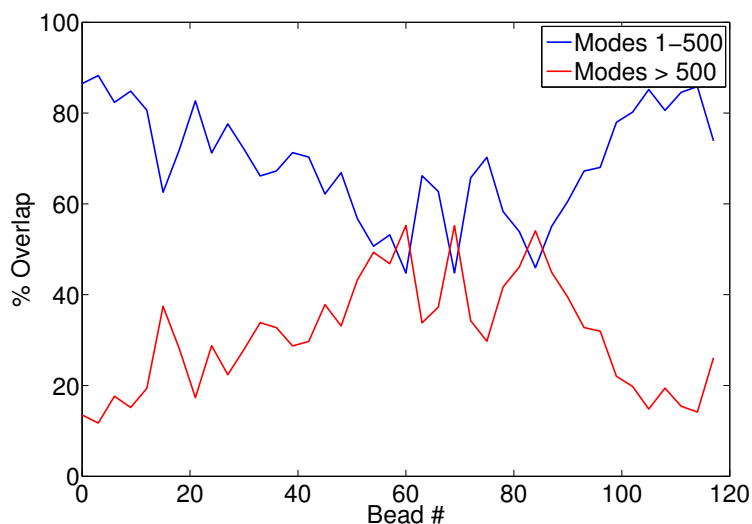

Figure S1: Normal Mode projections onto displacements between beads in string converged pathway. The modes were computed for the initial (prohead 2) state using the an elastic network model with the RTB method<sup>1</sup> in which blocking was based upon secondary structural elements. Displacements were computed between bead  $i$  and bead  $i + 2$ . The percent overlap is the square of the normalized dot product between the normal mode and the displacement vector.

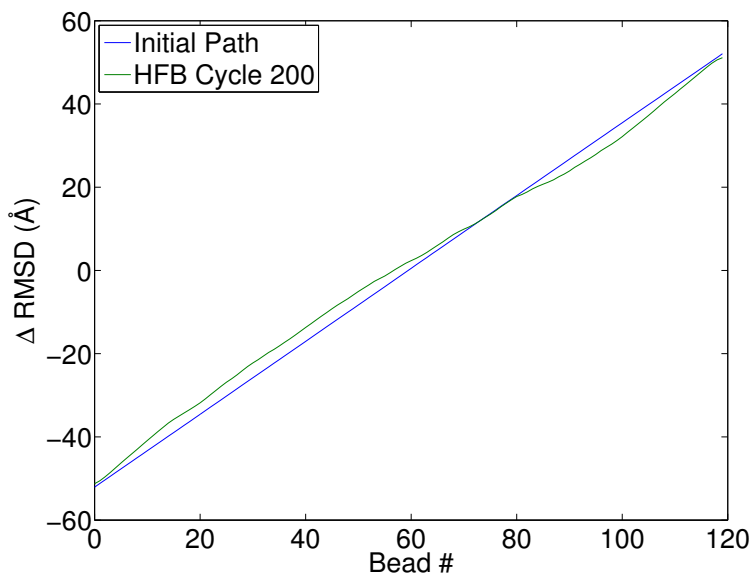

Figure S2: Comparison of  $\Delta\text{RMSD}$  ( $\text{RMSD}_{\text{initialstate}} - \text{RMSD}_{\text{finalstate}}$ ), computed over all heavy atoms, between the initial pathway and string converged pathway.

## References

- (1) Tama, F.; Gadea, F. X.; Marques, O.; Sanejouand, Y. H. *Proteins: Structure, Function, and Bioinformatics* **2000**, *41*, 1–7.
